# Supplementary material for: Maternal Trophic Status and Offpsring Phenotype in a Marine Invertebrate
Source: PubMed Central journal article supplement (PMC6018471; doi:10.1038/s41598-018-27709-2), 2018-06-25

## SUPPLEMENTARY TABLES AND FIGURES

TITLE: MATERNAL TROPHIC STATUS AND OFFSPRING PHENOTYPES IN A MARINE  
INVERTEBRATE

Enrique González-Ortegón<sup>1,2\*</sup>, Lewis Le Vay<sup>3</sup>, Mark Edward Mackay Walton<sup>3</sup> and Luis Giménez<sup>3</sup>

<sup>1</sup> ICMAN-Instituto de Ciencias Marinas de Andalucía (CSIC). Campus Universitario Río San Pedro, 11510  
Puerto Real, Cádiz. Spain.

<sup>2</sup>CEI-MAR International Campus of Excellence of the Sea

<sup>3</sup> School of Ocean Sciences, Bangor University, Menai Bridge LL59 5AB, UK

[enrique.gonzalez@icman.csic.es](mailto:enrique.gonzalez@icman.csic.es), [l.levay@bangor.ac.uk](mailto:l.levay@bangor.ac.uk), [m.walton@bangor.ac.uk](mailto:m.walton@bangor.ac.uk) and

[l.gimenez@bangor.ac.uk](mailto:l.gimenez@bangor.ac.uk)

\*Corresponding author: [enrique.gonzalez@icman.csic.es](mailto:enrique.gonzalez@icman.csic.es)

**Supplementary Table S1.** P values resulting from a GLM to evaluate the effects of season (summer vs. winter), stage (female-eggs and eggs-larvae) and body size on isotopic signal ( $\delta^{13}\text{C}$  and  $\delta^{15}\text{N}$ ), nutrient composition C:N and percentage of carbon and nitrogen of female muscle, eggs and larvae of *Palaemon serratus*. (Lc – female cephalothorax length). 2-way models: Model 1 (Season-Stage), Model 2 (Stage-Lc), Model 4.1 (Lc-Stage in winter), Model 4.2 (Lc-Stage in summer); 3-way model: Model 3 (Season-Stage-Lc). Significant terms are highlighted in bold.

| Females-Eggs |            |    |                       |                       |                    |                    | Eggs-Larvae        |      |                       |                       |                    |                    |                    |                    |
|--------------|------------|----|-----------------------|-----------------------|--------------------|--------------------|--------------------|------|-----------------------|-----------------------|--------------------|--------------------|--------------------|--------------------|
| Model        | Source     | df | $\delta^{13}\text{C}$ | $\delta^{15}\text{N}$ | C:N                | C%                 | N%                 | df   | $\delta^{13}\text{C}$ | $\delta^{15}\text{N}$ | C:N                | C%                 | N%                 |                    |
| Model 1      | Season(Se) | 1  | <10 <sup>-12</sup>    | <10 <sup>-02</sup>    | <10 <sup>-13</sup> | <10 <sup>-02</sup> | <10 <sup>-08</sup> | 1    | <10 <sup>-16</sup>    | <10 <sup>-15</sup>    | <10 <sup>-16</sup> | <10 <sup>-06</sup> | <10 <sup>-16</sup> |                    |
|              | Stage(St)  | 1  | <10 <sup>-16</sup>    | <10 <sup>-16</sup>    | <10 <sup>-16</sup> | <10 <sup>-16</sup> | <10 <sup>-16</sup> | 1    | <10 <sup>-07</sup>    | <b>0.02</b>           | <10 <sup>-16</sup> | <10 <sup>-16</sup> | <10 <sup>-13</sup> |                    |
|              | Se×St      | 1  | 0.10                  | <10 <sup>-06</sup>    | <10 <sup>-06</sup> | <10 <sup>-05</sup> | 0.08               | 1    | 0.92                  | 0.89                  | 0.05               | 0.05               | <b>0.03</b>        |                    |
|              | Res        | 55 |                       |                       |                    |                    |                    | 112  |                       |                       |                    |                    |                    |                    |
| Model 2      | Source     | df | $\delta^{13}\text{C}$ | $\delta^{15}\text{N}$ | C:N                | C%                 | N%                 | df   | $\delta^{13}\text{C}$ | $\delta^{15}\text{N}$ | C:N                | C%                 | N%                 |                    |
|              | Stage(St)  | 1  | <10 <sup>-16</sup>    | <10 <sup>-16</sup>    | <10 <sup>-16</sup> | <10 <sup>-16</sup> | <10 <sup>-16</sup> | 1    | <10 <sup>-3</sup>     | <10 <sup>-05</sup>    | <10 <sup>-16</sup> | <10 <sup>-16</sup> | <10 <sup>-07</sup> |                    |
|              | Lc         | 1  | <10 <sup>-12</sup>    | <10 <sup>-14</sup>    | <10 <sup>-12</sup> | <b>0.01</b>        | <10 <sup>-07</sup> | 1    | <10 <sup>-16</sup>    | <10 <sup>-16</sup>    | <10 <sup>-16</sup> | <10 <sup>-12</sup> | <10 <sup>-16</sup> |                    |
|              | St×Lc      | 1  | 0.08                  | <10 <sup>-06</sup>    | <10 <sup>-06</sup> | <10 <sup>-05</sup> | 0.23               | 1    | 0.75                  | 0.82                  | <b>0.04</b>        | <b>0.04</b>        | <b>0.01</b>        |                    |
| Res          | 55         |    |                       |                       |                    |                    | 112                |      |                       |                       |                    |                    |                    |                    |
| Model 3      | Source     | df | $\delta^{13}\text{C}$ | $\delta^{15}\text{N}$ | C:N                | C%                 | N%                 | df   | $\delta^{13}\text{C}$ | $\delta^{15}\text{N}$ | C:N                | C%                 | N%                 |                    |
|              | Stage(St)  | 1  | <10 <sup>-16</sup>    | <10 <sup>-16</sup>    | <10 <sup>-16</sup> | <10 <sup>-16</sup> | <10 <sup>-16</sup> | 1    | <10 <sup>-03</sup>    | <10 <sup>-05</sup>    | <10 <sup>-16</sup> | <10 <sup>-16</sup> | <10 <sup>-07</sup> |                    |
|              | Season(Se) | 1  | <10 <sup>-12</sup>    | <10 <sup>-02</sup>    | <10 <sup>-11</sup> | <b>0.01</b>        | <10 <sup>-07</sup> | 1    | <10 <sup>-16</sup>    | <10 <sup>-16</sup>    | <10 <sup>-16</sup> | <10 <sup>-16</sup> | <10 <sup>-16</sup> |                    |
|              | Lc         | 1  | <b>0.04</b>           | <10 <sup>-02</sup>    | 0.16               | 0.95               | 0.26               | 1    | <10 <sup>-03</sup>    | <10 <sup>-10</sup>    | <10 <sup>-03</sup> | 0.44               | <10 <sup>-06</sup> |                    |
|              | St×Se      | 1  | 0.08                  | <10 <sup>-06</sup>    | <10 <sup>-06</sup> | <10 <sup>-05</sup> | 0.09               | 1    | 0.86                  | 0.89                  | 0.09               | 0.12               | <b>0.04</b>        |                    |
|              | St×Lc      | 1  | 0.93                  | 0.80                  | 0.13               | 0.84               | 0.24               | 1    | 0.62                  | 0.49                  | 0.33               | <b>0.03</b>        | 0.13               |                    |
|              | Se×Lc      | 1  | 0.11                  | 0.29                  | 0.82               | 0.46               | 0.74               | 1    | <10 <sup>-02</sup>    | <10 <sup>-06</sup>    | <10 <sup>-03</sup> | <b>0.01</b>        | <b>0.01</b>        |                    |
|              | St×Se×Lc   | 1  | 0.63                  | 0.64                  | 0.76               | 0.81               | 0.49               | 1    | 0.92                  | 0.95                  | 0.25               | <b>0.03</b>        | 0.14               |                    |
| Res          | 51         |    |                       |                       |                    |                    | 108                |      |                       |                       |                    |                    |                    |                    |
| Model 4.1    | Source     | df | $\delta^{13}\text{C}$ | $\delta^{15}\text{N}$ | C:N                | C%                 | N%                 | df   | $\delta^{13}\text{C}$ | $\delta^{15}\text{N}$ | C:N                | C%                 | N%                 |                    |
|              | Stage(St)  | 1  | <10 <sup>-16</sup>    | <10 <sup>-14</sup>    | <10 <sup>-16</sup> | <10 <sup>-16</sup> | <10 <sup>-16</sup> | 1    | <10 <sup>-11</sup>    | <b>0.01</b>           | <10 <sup>-16</sup> | <10 <sup>-16</sup> | <10 <sup>-06</sup> |                    |
|              | Lc         | 1  | 0.70                  | 0.37                  | 0.09               | 0.61               | 0.63               | 1    | 0.86                  | 0.44                  | 0.48               | <b>0.02</b>        | 0.06               |                    |
|              | St×Lc      | 1  | 0.69                  | 0.90                  | 0.34               | 0.82               | 0.82               | 1    | 0.93                  | 0.84                  | 0.23               | 0.14               | 0.94               |                    |
| Res          | 26         |    |                       |                       |                    |                    | 51                 |      |                       |                       |                    |                    |                    |                    |
| Model 4.2    | Source     | df | $\delta^{13}\text{C}$ | $\delta^{15}\text{N}$ | C:N                | C%                 | N%                 | df   | $\delta^{13}\text{C}$ | $\delta^{15}\text{N}$ | C:N                | C%                 | N%                 |                    |
|              | Stage(St)  | 1  | <10 <sup>-15</sup>    | <10 <sup>-10</sup>    | <10 <sup>-16</sup> | <10 <sup>-16</sup> | <10 <sup>-16</sup> | 1    | <10 <sup>-2</sup>     | 0.07                  | <10 <sup>-16</sup> | <10 <sup>-16</sup> | <10 <sup>-09</sup> |                    |
|              | Summer     | Lc | 1                     | <b>0.04</b>           | <10 <sup>-02</sup> | 0.42               | 0.54               | 0.27 | 1                     | <10 <sup>-3</sup>     | <10 <sup>-09</sup> | <10 <sup>-05</sup> | <b>0.03</b>        | <10 <sup>-05</sup> |
|              | St×Lc      | 1  | 0.71                  | 0.51                  | 0.27               | 0.94               | 0.12               | 1    | 0.86                  | 0.76                  | 0.53               | <b>0.04</b>        | <b>0.03</b>        |                    |
| Res          | 25         |    |                       |                       |                    |                    | 57                 |      |                       |                       |                    |                    |                    |                    |

**Supplementary Table S2.** Results of the 2-way and 3-way PERMANOVA for  $\delta^{13}\text{C}$  and  $\delta^{15}\text{N}$  in *Palaemon serratus*, design with factors Season (Summer and winter), Stage (Female, Larvae and eggs) and the covariate maternal cephalothorax length (Lc) as fixed factors. 2-way models: Model 1 (Season-Stage), Model 2 (Stage-Lc), Model 4.1 (Lc-Stage in winter), Model 4.2 (Lc-Stage in summer); 3-way model: Model 3 (Season-Stage-Lc). The analysis is based on the modified Euclidean distance dissimilarity of tissues isotopic signal of  $\delta^{13}\text{C}$  and  $\delta^{15}\text{N}$  (99999 permutations). Significant terms are highlighted in bold.

| Females -Eggs |            |        |           |           | Eggs-Larvae   |        |           |           |               |
|---------------|------------|--------|-----------|-----------|---------------|--------|-----------|-----------|---------------|
| Model         | Source     | df     | SS        | Pseudo-F  | P(perm)       | df     | SS        | Pseudo-F  | P(perm)       |
| Model 1       | Season(Se) | 1      | 23.467    | 47.134    | <b>1e-5</b>   | 1      | 108.95    | 101.75    | <b>1e-5</b>   |
|               | Stage(St)  | 1      | 343.02    | 688.96    | <b>1e-5</b>   | 1      | 18.334    | 17.122    | <b>1e-5</b>   |
|               | Se×St      | 1      | 6.5682    | 13.192    | <b>2e-5</b>   | 1      | 2.42E-2   | 2.26E-2   | 0.9768        |
|               | Res        | 57     | 28.379    |           |               | 112    | 119.93    |           |               |
| Model 2       | Source     | df     | SS        | Pseudo-F  | P(perm)       | df     | SS        | Pseudo-F  | P(perm)       |
|               | Stage(St)  | 1      | 341.06    | 804.32    | <b>1e-5</b>   | 1      | 18.105    | 19.751    | <b>1e-5</b>   |
|               | Lc         | 1      | 25.204    | 59.437    | <b>1e-5</b>   | 1      | 126.41    | 137.9     | <b>1e-5</b>   |
|               | St×Lc      | 1      | 5.1977    | 12.258    | <b>1e-5</b>   | 1      | 6.2884E-2 | 6.86E-2   | 0.9338        |
| Res           | 55         | 23.322 |           |           | 112           | 102.67 |           |           |               |
| Model 3       | Source     | df     | SS        | Pseudo-F  | P(perm)       | df     | SS        | Pseudo-F  | P(perm)       |
|               | Lc         | 1      | 25.204    | 60.474    | <b>1e-5</b>   | 1      | 126.41    | 157.62    | <b>1e-5</b>   |
|               | Season(Se) | 1      | 0.2634    | 0.63199   | 0.5334        | 1      | 4.3266    | 5.3947    | <b>0.0059</b> |
|               | Stage(St)  | 1      | 341.45    | 819.28    | <b>1e-5</b>   | 1      | 18.105    | 22.575    | <b>1e-5</b>   |
|               | Lc×Se      | 1      | 0.8201    | 1.9678    | 0.1459        | 1      | 11.671    | 14.553    | <b>2e-5</b>   |
|               | Lc×St      | 1      | 4.9896    | 11.972    | <b>4e-5</b>   | 1      | 4.6788E-2 | 5.8339E-2 | 0.9427        |
|               | Se×St      | 1      | 0.71255   | 1.7097    | 0.1861        | 1      | 6.2716E-2 | 7.8198E-2 | 0.9229        |
|               | Lc×Se×St   | 1      | 9.4615E-2 | 0.22702   | 0.7984        | 1      | 4.8968E-3 | 6.1056E-3 | 0.9941        |
| Res           | 51         | 21.255 |           |           | 108           | 86.617 |           |           |               |
| Model 4.1     | Source     | df     | SS        | Pseudo-F  | P(perm)       | df     | SS        | Pseudo-F  | P(perm)       |
|               | Lc         | 1      | 0.18999   | 0.64336   | 0.502         | 1      | 0.122     | 0.43415   | 0.5505        |
|               | Stage(St)  | 1      | 206.61    | 699.62    | <b>1e-5</b>   | 1      | 7.3339    | 26.098    | <b>1e-5</b>   |
|               | Lc×St      | 1      | 1.5329E-2 | 5.1907E-2 | 0.9453        | 1      | 7.9105E-3 | 2.815E-2  | 0.9523        |
| Res           | 26         | 7.6782 |           |           | 51            | 14.332 |           |           |               |
| Model 4.2     | Source     | df     | SS        | Pseudo-F  | P(perm)       | df     | SS        | Pseudo-F  | P(perm)       |
|               | Lc         | 1      | 4.5278    | 6.9845    | <b>0.0039</b> | 1      | 33.284    | 26.621    | <b>1e-5</b>   |
|               | Stage      | 1      | 141.4     | 218.12    | <b>1e-5</b>   | 1      | 11.428    | 9.1398    | <b>0.0008</b> |
|               | Lc×St      | 1      | 4.5672E-2 | 7.0454E-2 | 0.9284        | 1      | 7.0698E-2 | 5.6545E-2 | 0.942         |
| Res           | 27         | 17.503 |           |           | 58            | 72.518 |           |           |               |

**Supplementary Table S3.** Average and coefficient of variation in  $\delta^{13}\text{C}$  and  $\delta^{15}\text{N}$  of females, larvae and eggs of *Palaemon serratus* in summer and winter samples.

| Isotopes | $\delta^{13}\text{C}$ |     |        |     |        |     | $\delta^{15}\text{N}$ |     |        |     |       |     |
|----------|-----------------------|-----|--------|-----|--------|-----|-----------------------|-----|--------|-----|-------|-----|
|          | Female                |     | Larvae |     | Eggs   |     | Female                |     | Larvae |     | Eggs  |     |
|          | Mean                  | CV  | Mean   | CV  | Mean   | CV  | Mean                  | CV  | Mean   | CV  | Mean  | CV  |
| Summer   | -17.08                | 3.4 | -20.11 | 4.6 | -21.25 | 4.5 | 14.76                 | 2.7 | 13.07  | 6.5 | 13.04 | 5.8 |
| Winter   | -17.90                | 1.9 | -21.76 | 1.3 | -22.74 | 1.1 | 15.95                 | 2.5 | 14.22  | 3.0 | 13.44 | 4.0 |

**Supplementary Figure S1.** Individual variation of the carbon and nitrogen content from female to eggs and from eggs to freshly hatched larvae sampled over 2 seasons (winter vs. summer).

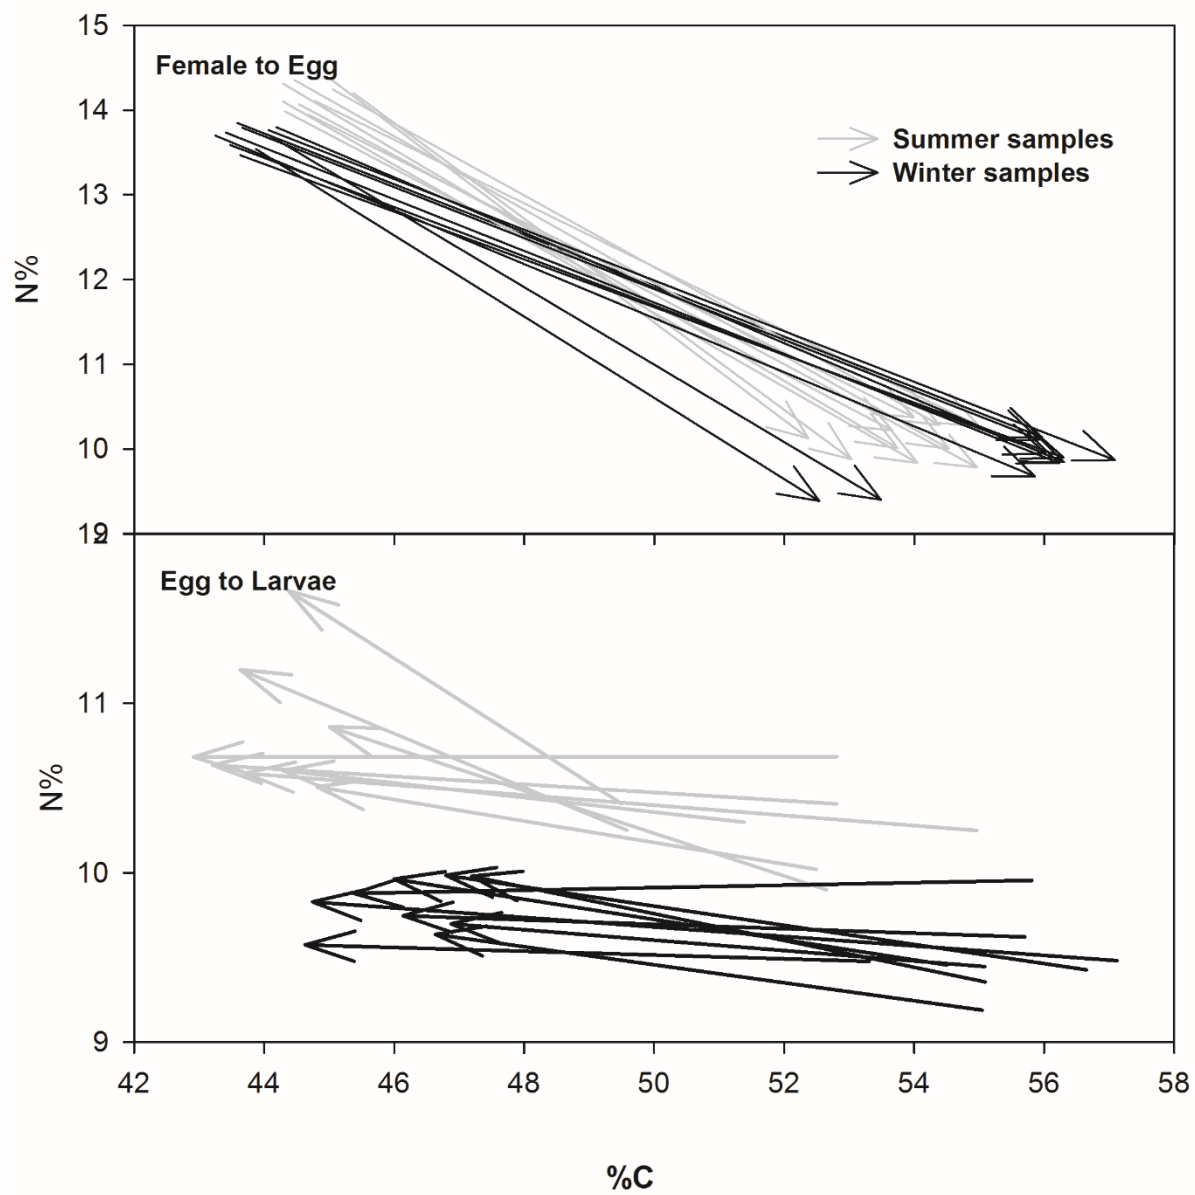

**Supplementary Figure S2.** Individual variation of the carbon and nitrogen isotopic signal (‰) from female to eggs and from eggs to freshly hatched larvae sampled over 2 seasons (winter vs. summer).

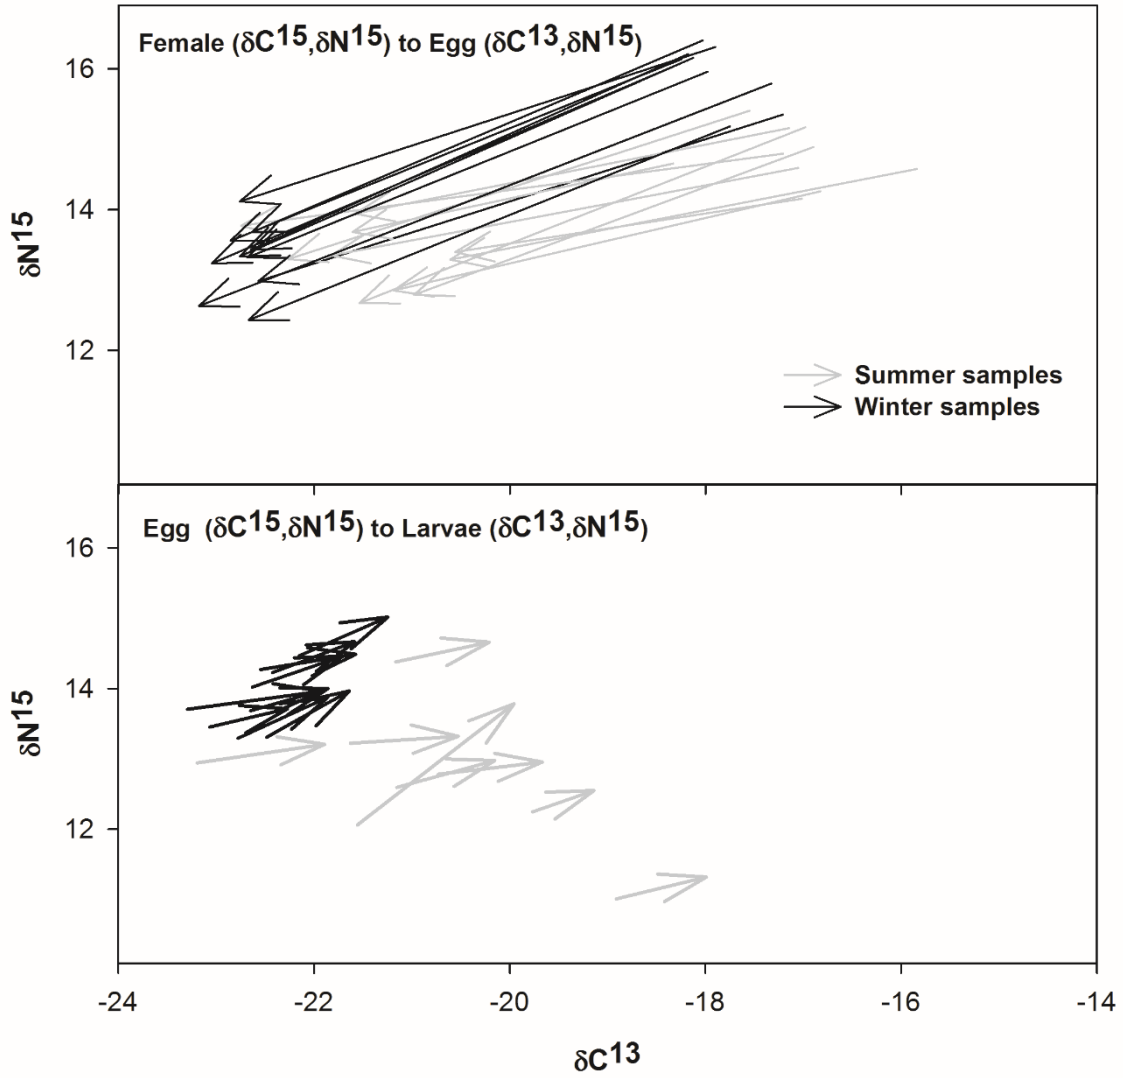

Supplement: 41598_2018_27709_MOESM1_ESM.pdf [file 41598_2018_27709_MOESM1_ESM.pdf]
